# Supplementary material for: “Turn-on” fluorescence sensing for sensitively detecting Cr(vi) via a guest exchange process in Cu NCs@MIL-101 composites
Source: Royal Society of Chemistry journal article supplement (doi:10.1039/d4ay00956h), 2024-01-01
Supplement: d4ay00956h1.pdf [file d4ay00956h1.pdf]

## Supporting Information

### **A “turn-on” fluorescence sensing for sensitively detecting Cr(VI) via a guest exchange process in Cu NCs@MIL-101 composites**

Huijing Chen<sup>a</sup>, Bo Peng<sup>a</sup>, Ping Zhang<sup>a</sup>, Ying Yang<sup>a</sup>, Xue Hu<sup>a\*</sup>

*<sup>a</sup> Anhui Provincial Key Laboratory of Environmental Pollution Control and Resource Reuse; School of Environment and Energy Engineering, Anhui Jianzhu University, Hefei 230601, China.*

\*Corresponding authors. Tel./Fax: +86-18716318049 (X. Hu).

E-mail addresses: *huxue602@163.com* (X. Hu)

Table S1 Comparison of fluorescent methods for the detection of Cr(VI) in terms of linear range and the limit of detection (LOD).

| System                               | Mode                    | Linear range<br>( $\mu\text{M}$ )              | Detection limits<br>( $\mu\text{M}$ ) | Ref.      |
|--------------------------------------|-------------------------|------------------------------------------------|---------------------------------------|-----------|
| GSH-Au NCs                           | Turn-off                | 0.017-1.7                                      | 0.0017                                | [1]       |
| Lys/BSA-Ag/AuNCs                     | Turn-off                | 0.003-0.11                                     | 0.00037                               | [2]       |
| Cys-Cu NCs                           | Turn-off                | 0.2-60                                         | 0.065                                 | [3]       |
| 11-MUA-AuNCs                         | Turn-off                | -                                              | -                                     | [4]       |
| GSH@CDs-Cu NCs                       | Ratiometric fluorescent | 2-40                                           | 0.9                                   | [5]       |
| Cysteamine-Au/Cu NCs                 | Turn-off                | 0.2-100                                        | 0.08                                  | [6]       |
| Thiosalicylic acid/Cysteamine-Cu NCs | Turn-off                | 0.1-1000                                       | 0.03                                  | [7]       |
| Cu NCs@TA                            | Turn-off                | 0.03-60                                        | 0.005                                 | [8]       |
| TSA/BSA-Cu NCs                       | Turn-off                | 0.05-0.4                                       | 0.0035                                | [9]       |
| Au NCs-CDs                           | Turn-off                | 0-10                                           | 0.005                                 | [10]      |
| Cu NCs@MIL-101                       | Turn-on                 | 0.05-1 $\mu\text{M}$<br>and 1-20 $\mu\text{M}$ | 0.05                                  | This work |

Table S2 The content of Cu in Cu NCs@MIL-101 before and after reaction with Cr(VI).

| Material                                   | Weight percentage | Atomic percentage |
|--------------------------------------------|-------------------|-------------------|
| Cu NCs@MIL-101 before reaction with Cr(VI) | 0.09              | 0.02              |
| Cu NCs@MIL-101 after reaction with Cr(VI)  | 0.00              | 0.00              |

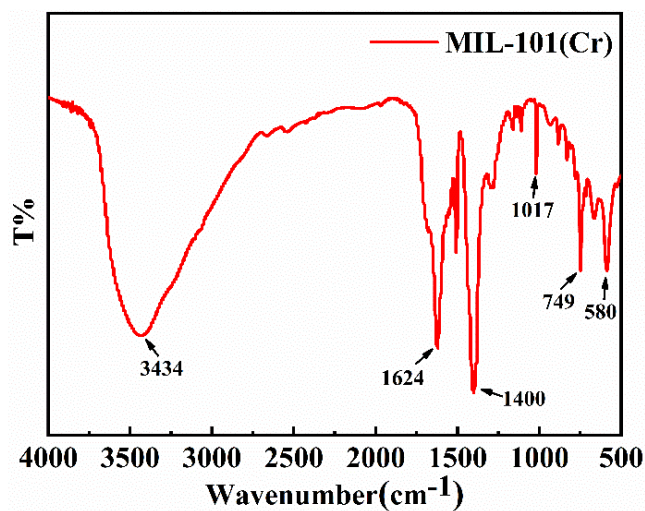

Fig S1 FT-IR spectra of the MIL-101(Cr).

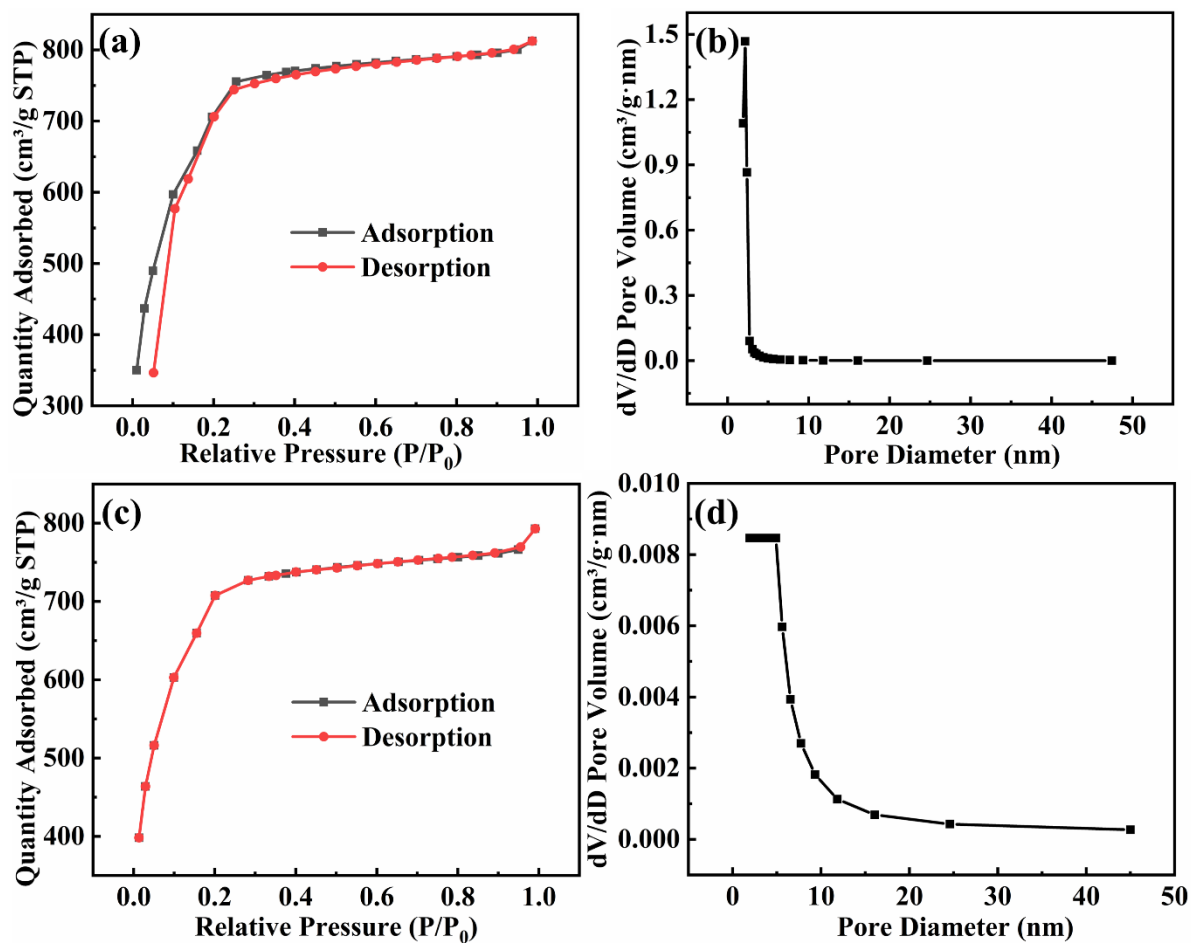

Fig.S2. N<sub>2</sub> adsorption/desorption isotherm of MIL-101(Cr) (a) and Cu NCs@MIL-101 (c), Pore size distributions of MIL-101(Cr) (b) and Cu NCs@MIL-101 (d).

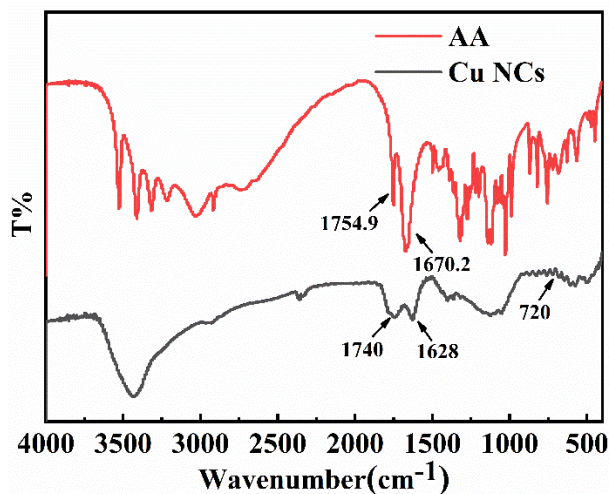

Fig. S3. FT-IR spectra of the AA and Cu NCs.

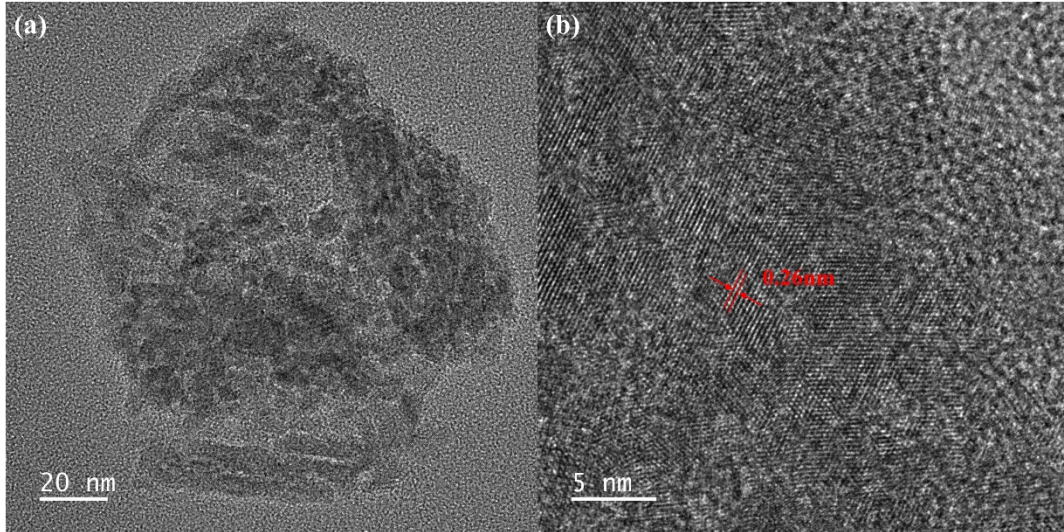

Fig. S4. TEM image (a) and HRTEM image (b) of the Cu NCs.

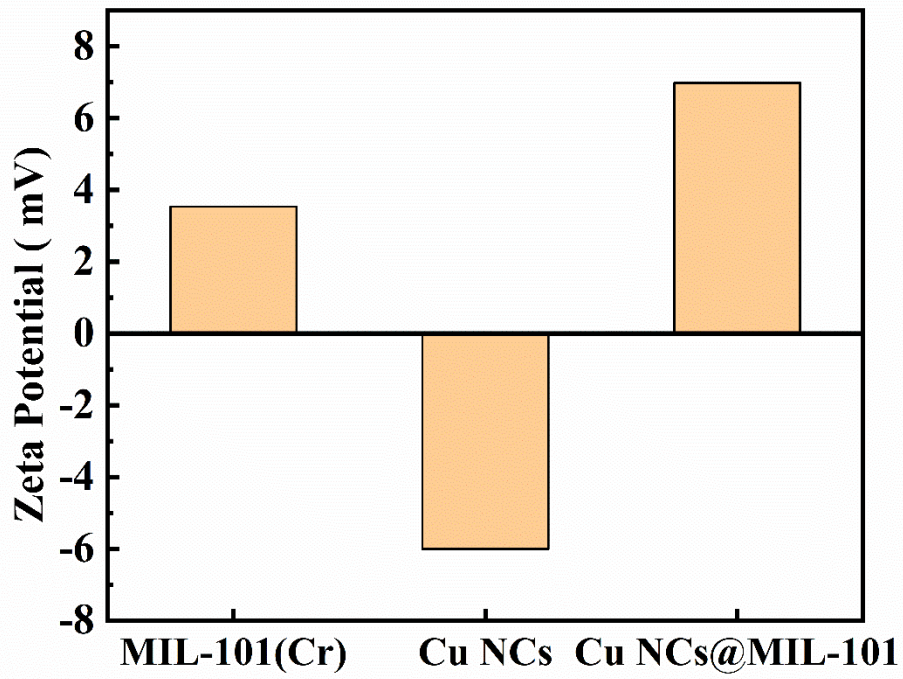

Fig.S5 The zeta potential of MIL-101(VI), Cu NCs and Cu NCs@MIL-101.

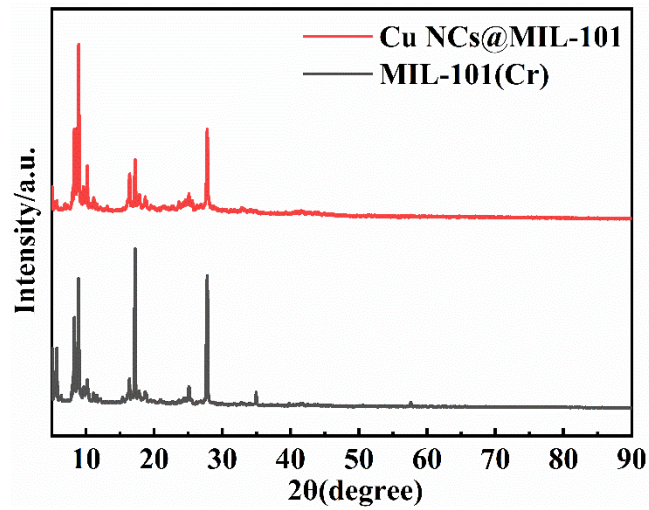

Fig S6 The XRD patterns of the Cu NCs@MIL-101 and MIL-101(Cr).

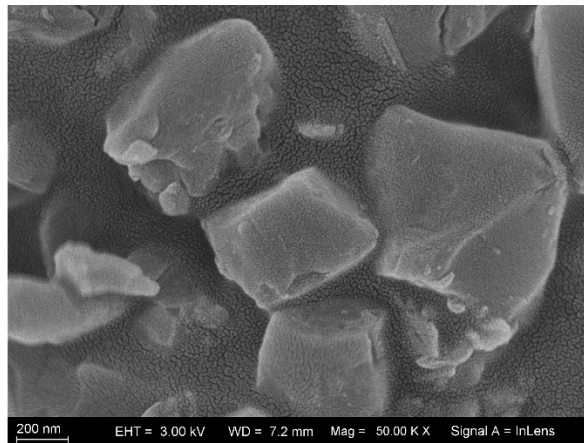

Fig S7 SEM image of Cu NCs@MIL-101.

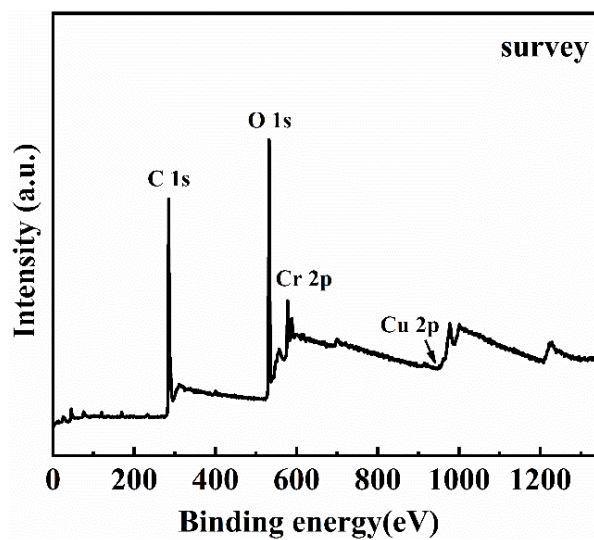

Fig S8 The XPS survey spectrum of the prepared Cu NCs@MIL-101(Cr).

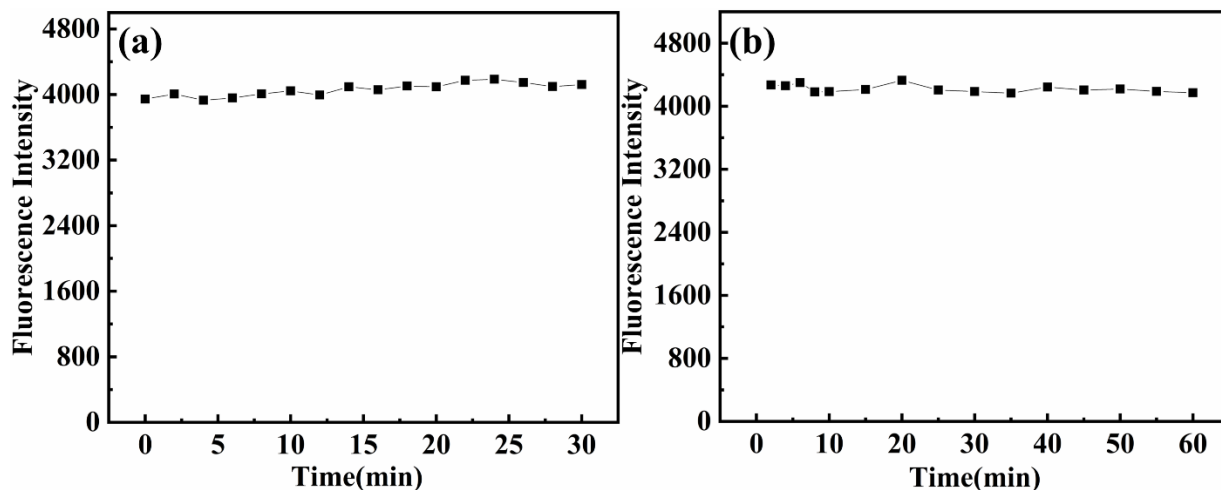

Fig.S9 (a) Photostability of the Cu NCs@MIL-101. Irradiation source: 150 W Xe lamp. (b) Variation of fluorescence intensity of Cu NCs@MIL-101 with time

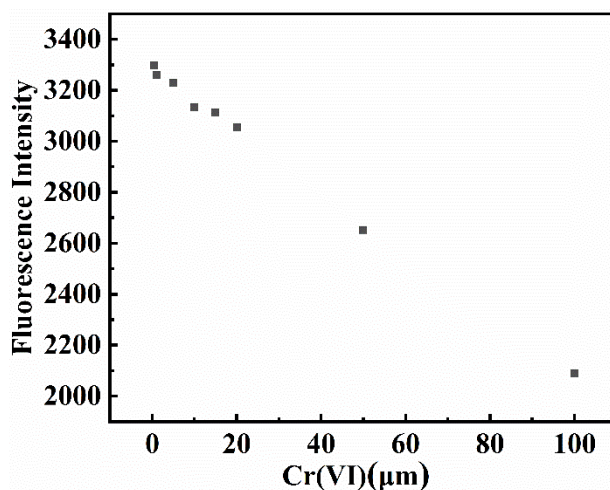

Fig S10 The Fluorescence response of Cu NCs alone interact with Cr(VI).

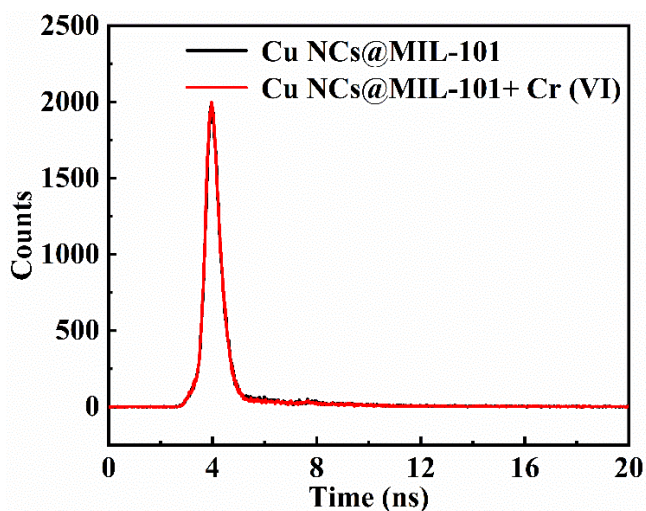

Fig S11 The fluorescence lifetime decay curves of Cu NCs@MIL-101 with and without Cr(VI).

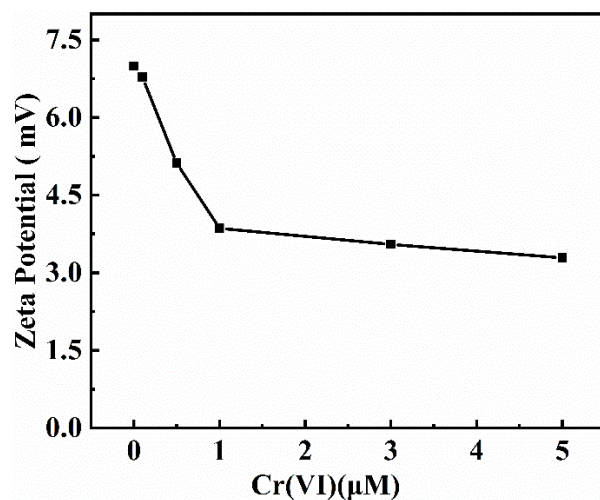

Fig.S12 The zeta potential of Cu NCs@MIL-101 under different concentrations of Cr(VI) ranging from 0.0 to 5.0.

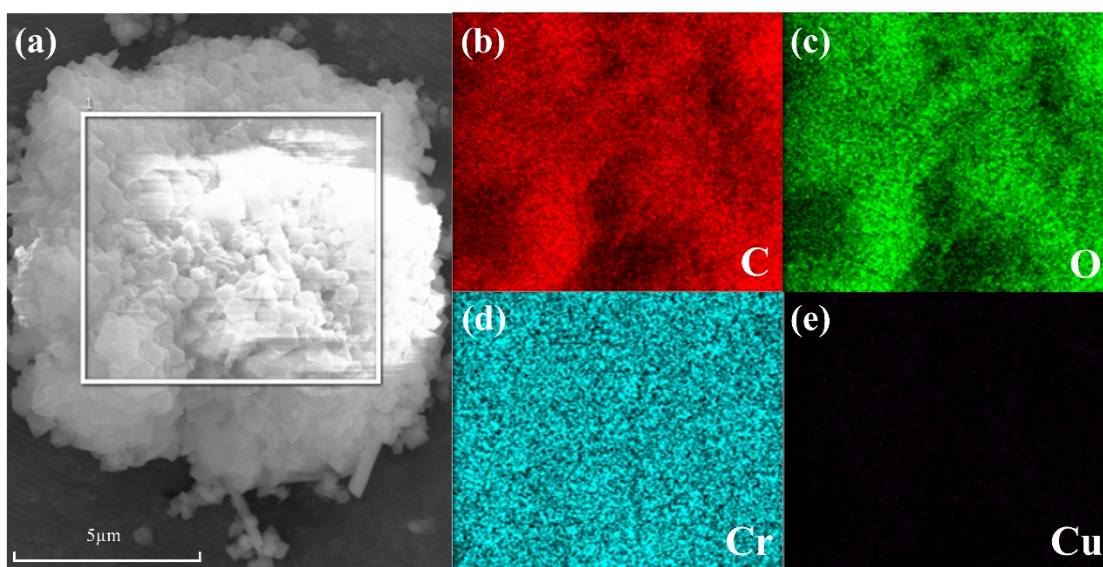

Fig S13 (a) SEM images of Cu NCs@MIL-101. (b-e) EDS images of C, O, Cr and Cu elements in Cu NCs@MIL-101 after reaction with Cr(VI).

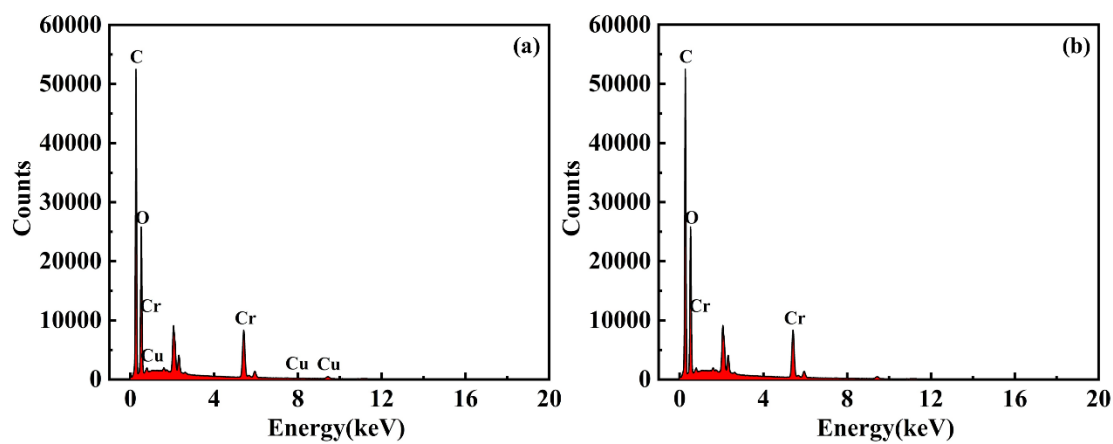

Fig. S14 SEM-EDS analysis result of Cu NCs@MIL-101 (a) and after reaction with Cr(VI) (b).

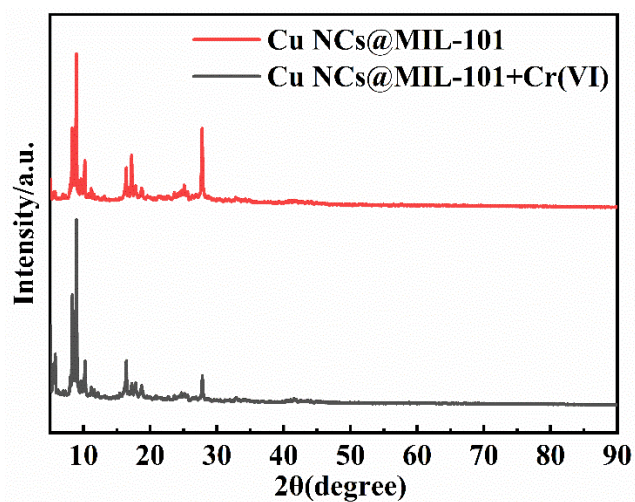

Fig S15 The XRD patterns of the Cu NCs@MIL-101 with and without Cr(VI).

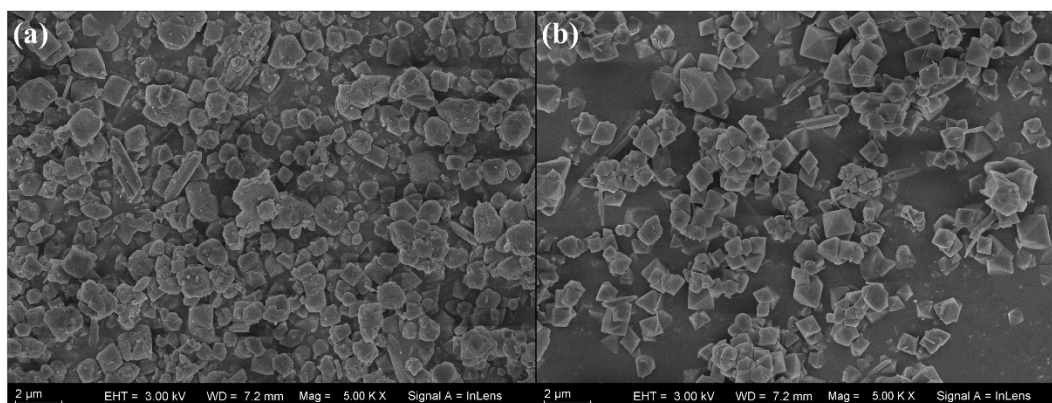

Fig S16 SEM image of Cu NCs@MIL-101 before (a) and after (b) reaction with Cr(VI).

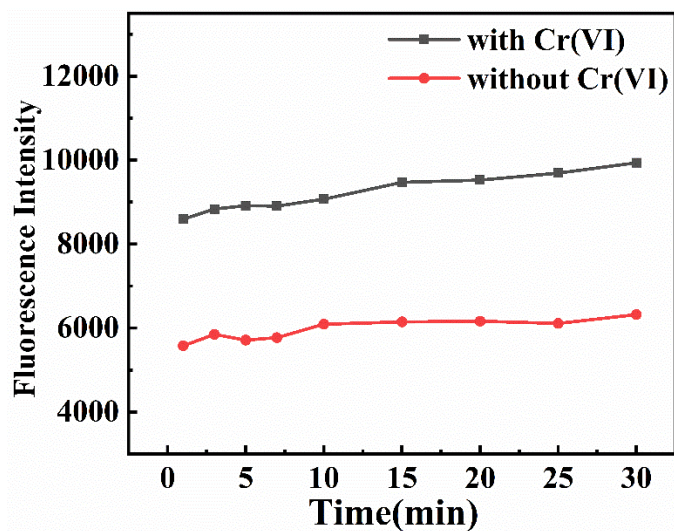

Fig S17 The reaction kinetic between the Cu NCs@MIL-101 pair and Cr(VI).



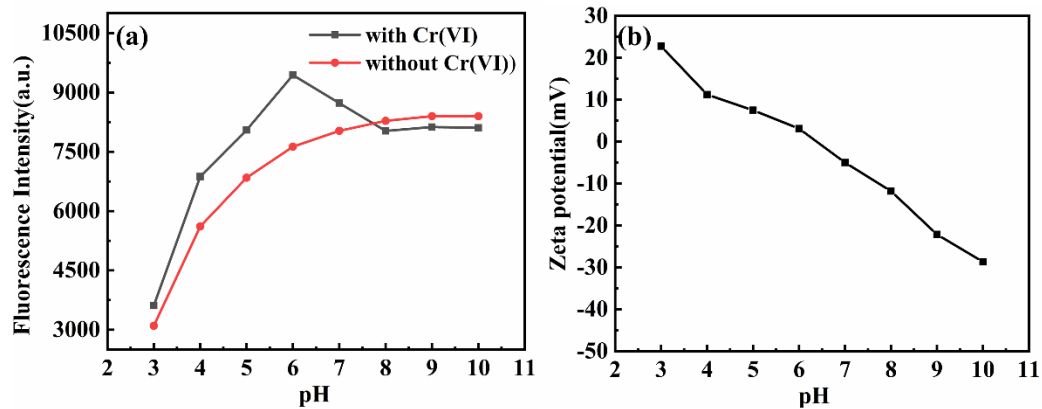

Fig S18 The influence for the fluorescence response of Cr(VI) for the Cu NCs@MIL-101 pair from pH change (a) and the zeta potential of Cu NCs@MIL-101 under different solution pH ranging from 3.0 to 10.0 (b).

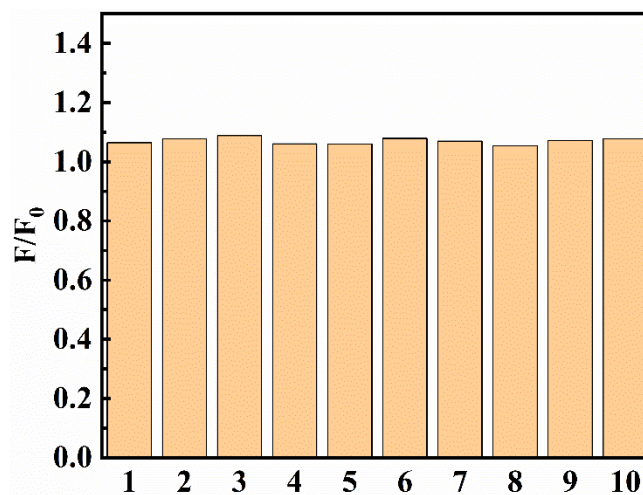

Fig.S19 Ten parallel samples of Cu NCs@MIL-101 reacted with Cr(VI) ( $10\mu\text{M}$ ).

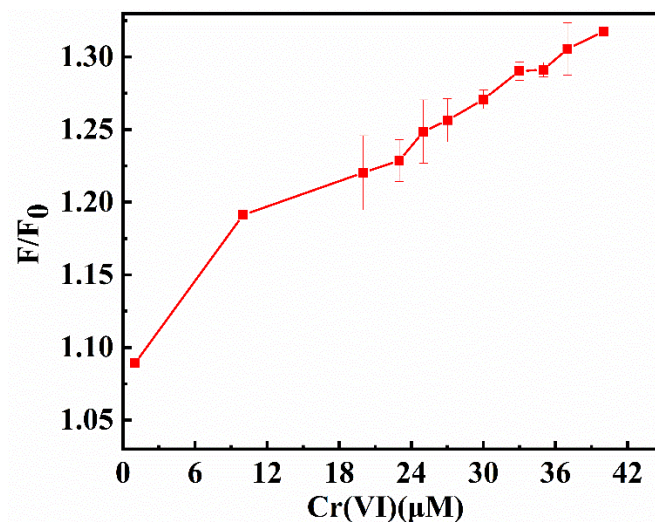

Fig S20 The variation of fluorescence intensity of the Cu NCs@MIL-101 pair with the amounts increasing of Cr(VI) from 0 to 40  $\mu\text{M}$ .

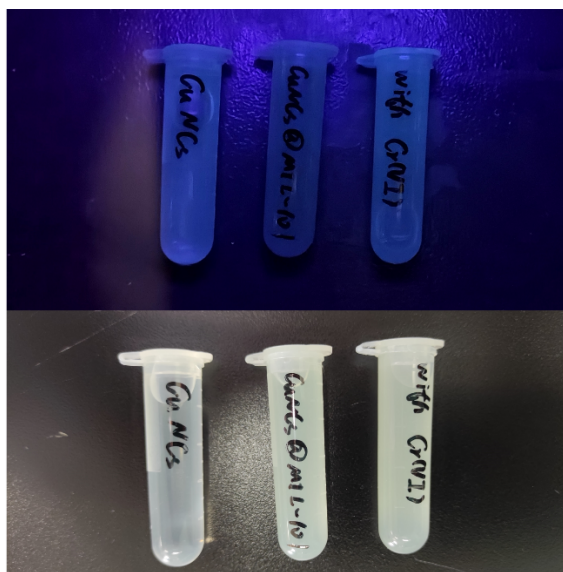

Fig.S21 Naked eye observation of Cu NCs (left), Cu NCs@MIL-101 before (middle) and after reaction with Cr(VI) (right) under UV light (above) and sun light (under).

## References

1. H. Y. Zhang, Q. Liu, T. Wang, Z. J. Yun, G. L. Li, J. Y. Liu, and G. B. Jiang, *Anal Chim Acta.*, 2013, 770, 140-146.
2. Z. J. Cheng, Y. C. Fan, L. Zhang, and C. Wang, *J Mol Struct.*, 2023, 1275, 134712.
3. M. L. Cui, G. Song, C. Wang, and Q. J. Song, *Microchim Acta.*, 2015, 182, 1371-1377.
4. J. Sun, J. Zhang, and Y. D. Jin, *J Mater Chem C.*, 2013, 1, 138-143.
5. H. Y. Bai, Z. Q. Tu, Y. T. Liu, Q. X. Tai, Z. K. Guo, and S. U. Liu, *J Hazard Mater.*, 2020, 386, 121654.
6. M. Shellaiah, T. Simon, N. Thirumalaivasan, K. W. Sun, F. H. Ko, and S. P. Wu, *Microchim Acta.*, 2019, 186, 1-8.
7. Y. S. Lin, T. C. Chiu, and C. C. Hu, *RSC Adv.*, 2019, 9, 9228-9234.
8. X. L. Cao, Y. G. Bai, F. X. Liu, F. Li, and Y. N. Luo, *Luminescence.*, 2021, 36, 229-236.
9. A. Nain, Y. T. Tseng, Y. S. Lin, S. C. Wei, R. P. Mandal, B. Unnikrishnan, C. C. Huang, F. G. Tseng, and H. T. Chang, *Sensor Actuat B-Chem.*, 2020, 321, 128539.
10. L. Y. Yu, L. Y. Zhang, G. J. Ren, S. Li, B. Y. Zhu, F. Chai, F. Y. Qu, C. G. Wang, and Z. M. Su, *Sensor Actuat B-Chem.*, 2018, 262, 678-686.
